# Supplementary material
Source: Springer Nature journal article supplement (https://www.springermedizin.de/resource/supplementary/12943_2003_46_MOESM1_ESM.pdf/9553318)
Supplement: MOESM1 [file 9553318]

BXPC-3  
Panc-1  
MiaPaca  
Capan-1  
Capan-2

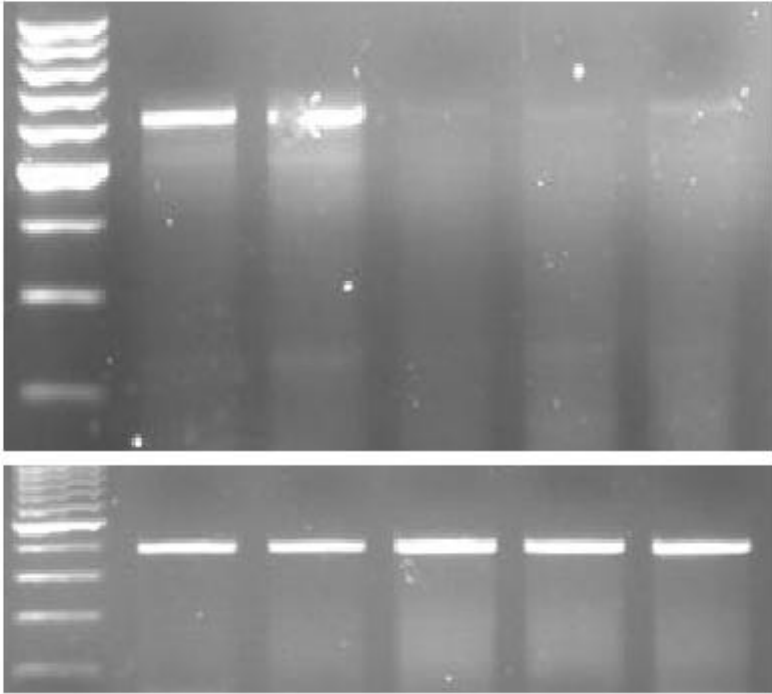

← p8

Detailed description: This figure shows two panels of agarose gel electrophoresis. The top panel shows a DNA ladder on the left and five lanes corresponding to cell lines BXPC-3, Panc-1, MiaPaca, Capan-1, and Capan-2. A band labeled 'p8' is indicated by an arrow on the right, with bands of varying intensity present in the first four lanes and a very faint band in the fifth. The bottom panel shows the same DNA ladder and lanes. A band labeled 'RL3' is indicated by an arrow on the right, with bands of similar intensity present in all five lanes.

← RL3
